# Supplementary material for: Blood Pressure Non-Dipping and Obstructive Sleep Apnea Syndrome: A Meta-Analysis
Source: PubMed Central journal article supplement (PMC6780266; doi:10.3390/jcm8091367), 2019-09-02
Supplement: jcm-08-01367-s001.pdf [file jcm-08-01367-s001.pdf]

**Supplementary Table S1.** Data on definition of dipping pattern, night-time period, interval of night-time blood pressure measurements and type of ambulatory blood pressure monitoring devices provided by the selected 14 studies.

| <b>Author (reference) Year publication</b> | <b>ABPM Device</b> | <b>Definition of Dipping</b> | <b>Definition Night-time period</b> | <b>Interval of night-time BP measurements</b> |
|--------------------------------------------|--------------------|------------------------------|-------------------------------------|-----------------------------------------------|
| <b>Loredo <sup>(15)</sup> 2001</b>         | Spacelabs 90207    | MAP decrease > 10%           | 10 PM- 6 AM                         | 30 min                                        |
| <b>Tsioufis <sup>(16)</sup> 2008</b>       | Spacelabs 90207    | SBP/DBP decrease >10%        | 12 PM-6 AM                          | 30 min                                        |
| <b>Sasaki <sup>(17)</sup> 2012</b>         | FM 800 or FB 250*  | MAP decrease > 10%           | 10 PM- 6 AM                         | 30 min                                        |
| <b>Onen <sup>(18)</sup> 2012</b>           | Spacelabs 90207    | MAP decrease > 10%           | 10 PM-7 AM                          | 30 min                                        |
| <b>Ishikawa <sup>(19)</sup> 2012</b>       | TM 2425            | SBP/DBP decrease >10%        | Diary                               | 30 min                                        |
| <b>Lee <sup>(20)</sup> 2014</b>            | Mobil-O-Graph      | SBP decrease >10%            | 11 PM- 6AM                          | 30 min                                        |
| <b>Seif <sup>(21)</sup> 2014</b>           | Spacelabs 90207    | MAP decrease > 10%           | 10 PM- 6AM                          | 30 mim                                        |
| <b>Sarinc Ulasli <sup>(22)</sup> 2014</b>  | Mobil-O-Graph      | BP decrease > 10%            | n. a.                               | 30 min                                        |
| <b>Sasaki <sup>(23)</sup> 2014</b>         | FM 800 or FB 250   | BP decrease > 10%            | Diary                               | n.a                                           |
| <b>Correa <sup>(24)</sup> 2017</b>         | Spacelabs 90207    | MAP decrease > 10%           | Diary                               | 30 min                                        |
| <b>Ma <sup>(25)</sup> 2017</b>             | Contec, CM 506 C   | n.a.                         | 10 PM -6 AM                         | 60 min                                        |
| <b>Jenner <sup>(26)</sup> 2017</b>         | Spacelabs 90207    | n-a.                         | Diary                               | 20 min                                        |
| <b>Genta Pereira <sup>(27)</sup> 2018</b>  | Spacelabs 90207    | SBP or DBP decrease > 10%    | Diary                               | 20 min                                        |
| <b>Sesizuka <sup>(28)</sup> 2018</b>       | FM 800             | SBP decrease >10%            | Diary                               | 30 min                                        |

ABPM=Ambulatory blood pressure monitoring; MAP=mean arterial pressure; SBP=systolic blood pressure; DBP=diastolic blood pressure.
